# Supplementary material
Source: PubMed Central journal article supplement (PMC8409906)
Supplement: mmc1.pdf [file mmc1.pdf]

# THE LANCET

## **Supplementary appendix**

This appendix formed part of the original submission. We post it as supplied by the authors.

Supplement to: Kaseje N, Walcott D. Global youth advocating for COVID-19 vaccines for all. *Lancet* 2021; published online Sept 1. [http://dx.doi.org/10.1016/S0140-6736\(21\)01994-2](http://dx.doi.org/10.1016/S0140-6736(21)01994-2).

## Appendix 21-06180

**Members of the Global Youth Coalition championing Vaccines For All**

|                              |                              |
|------------------------------|------------------------------|
| Neema Kaseje                 | Kenya                        |
| David Walcott                | Jamaica                      |
| Yoshinobu Nagamine           | Switzerland                  |
| George Angango               | Kenya                        |
| Brigid Ongonga               | Kenya                        |
| Jacob Miruka                 | Kenya                        |
| Steve Gudha                  | Kenya                        |
| Anjhula Mya Singh-Bais       | Malaysia                     |
| Eleni Antoniadou             | Singapore                    |
| Stephen Achola               | Kenya                        |
| Tolullah Oni                 | UK                           |
| Nerissa Naidu                | USA                          |
| Jacques-Philippe Piverger    | USA                          |
| Jimmie Chengo                | Kenya                        |
| Mariam Raheem                | Pakistan                     |
| Ludovic Subran               | France                       |
| Ignacio Bugueño Vilches      | Chile                        |
| Mwende Mwololo               | USA                          |
| Omron Blauo                  | Germany                      |
| Carlos Reines                | USA                          |
| Kleophas Omondi              | Kenya                        |
| Biliny Manyang               | Kenya                        |
| Ronald Ochoo                 | Uganda                       |
| Kelly Buchanan               | United Kingdom               |
| Nawal Mohamed                | Somalia                      |
| Edwin Macharia               | Kenya                        |
| Hasna Sidahmed               | Sudan                        |
| Timothée Akilimali Bigombire | Democratic Republic of Congo |

|                           |                                 |
|---------------------------|---------------------------------|
| Terrence Kommal           | South Africa                    |
| Karanvir Singh            | India                           |
| Bianca Goebel             | Australia                       |
| Abubakar Kabura           | Kenya                           |
| Dak Deng                  | Kenya                           |
| Feven Tesfaye             | Ethiopia                        |
| Edwin Kutsushi            | Kenya                           |
| John Mushi                | Tanzania                        |
| Fredrick Omunga Angalika  | Kenya                           |
| Fedinard Arunga           | Kenya                           |
| Austine Okode             | Kenya                           |
| Kevin Oria                | Kenya                           |
| Loibon Masingisa          | Tanzania                        |
| Yetneberesh Molla         | Kenya                           |
| Tadicha Jlllo             | Kenya                           |
| Valentine Muchiri         | Kenya                           |
| Christiane Masirika       | Democratic<br>Republic of Congo |
| Vidyadhar Prabhudesai     | India                           |
| Prabhu Kunwar Singh       | India                           |
| Chitra Gomanee            | Mauritius                       |
| Bibi la Luz Gonzalez      | Guatemala                       |
| Avijit Tripathy           | India                           |
| Muhammad Azhar Joomun     | Mauritius                       |
| Leah Erasto Mollel        | Tanzania                        |
| Abdillahi Mohamed         | Somalia                         |
| Geoffrey Owiti            | Kenya                           |
| Gonzalo Benetti Hernández | Argentina                       |
| Facundo Cajén             | Argentina                       |
| Daniel Mahadzir           | Malaysia                        |
| Mariana Vega              | Panamá                          |

|                       |                     |
|-----------------------|---------------------|
| Isabella Gonzalez     | Guatemala           |
| Ian Donahue           | USA                 |
| Jade Murray           | Trinidad and Tobago |
| Susannah Rodgers      | UK                  |
| Marga Gual Soler      | Spain               |
| Domoina RATSIRAHONANA | Madagascar          |
| Billy Mawasha         | South Africa        |
| Wilmot Allen          | Kenya/USA           |
| Vikas Pota            | United Kingdom      |
| Fatoumata BA          | Senegal             |
| Janelle Zakour        | Trinidad and Tobago |
| Curtis Henry          | Trinidad and Tobago |
| Akim Daouda           | Gabon               |
| Julian Morrison       | Jamaica             |
| Brooke Hadeed         | Trinidad            |
| Ali Matalon           | Jamaica             |
| Joshua Joseph         | Trinidad and Tobago |
| Jane Burston          | United Kingdom      |
| Danielle Cosgrove     | Trinidad and Tobago |
| Clement Agoni         | South Africa        |
| Dominique Ramsawak    | Trinidad and Tobago |
| Michele Wucker        | USA                 |
| Jesmane Boggenpoel    | South Africa        |
| Rain Newton-Smith     | UK                  |
| Sam Gregory           | USA                 |
| Isabella Gonzalez     | Guatemala           |
| Mustapha Mokass       | France              |

|                        |                |
|------------------------|----------------|
| Thomas Crowther        | Switzerland    |
| Christoph Sutter       | Switzerland    |
| Valerie Keller         | Netherlands    |
| Philipp Rösler         | Switzerland    |
| Hilary Hao             | Philippines    |
| Christian Wenk         | Switzerland    |
| Imani Duncan-Price     | Jamaica        |
| Andre Loesekrug-Pietri | France/Germany |
| Jessica Franco         | Mexico         |
| Diane Binder           | France         |
| Farhana Parker         | South Africa   |
| Mamoteya Phala         | South Africa   |
| Nontuthuzelo Nikiwe    | South Africa   |
| Samuel Z Alemayehu     | USA            |
| Mokena Makeka          | South Africa   |
| Alberto Alemanno       | France         |
| Clara Gigling          | South Africa   |
| Vanshica Kant          | India          |
| Guillaume Lefevre      | United Kingdom |
